# Supplementary material for: Authentic Fear Responses in Virtual Reality: A Mobile EEG Study on Affective, Behavioral and Electrophysiological Correlates of Fear
Source: Frontiers journal article supplement (doi:10.3389/frvir.2021.716318), 2021-08-16
Supplement: Data_Sheet_3.PDF [file Data_Sheet_3.PDF]

### Supplementary material 3: Cronbach's alpha, scale range, number of items

**Table S16**

*Internal consistency (Cronbach's  $\alpha$ ) for each subscale of the utilized questionnaires*

| Questionnaire | Subscale                   | Number of items | Scale range | Cronbach's $\alpha$ |
|---------------|----------------------------|-----------------|-------------|---------------------|
| PANAS         | T1: PA                     | 10              | 10 - 50     | .78 <sup>b</sup>    |
|               | T1: NA                     | 10              | 10 - 50     | .68 <sup>a</sup>    |
|               | T2: PA                     | 10              | 10 - 50     | .85 <sup>c</sup>    |
|               | T2: NA                     | 10              | 10 - 50     | .79 <sup>b</sup>    |
| E-Scale       | Global empathy factor      | 25              | 25 - 125    | .82 <sup>c</sup>    |
| BIS/BAS       | Goal Drive                 | 4               | 4 - 16      | .66 <sup>a</sup>    |
|               | Fun Seeking                | 4               | 4 - 16      | .64 <sup>a</sup>    |
|               | Reward Responsiveness      | 5               | 5 - 20      | .46 <sup>a</sup>    |
|               | BIS                        | 7               | 7 - 28      | .78 <sup>b</sup>    |
| RST-PQ        | Reward Interest            | 7               | 7 - 28      | .65 <sup>a</sup>    |
|               | Goal Drive Persistence     | 7               | 7 - 28      | .77 <sup>b</sup>    |
|               | Reward Reactivity          | 9               | 9 - 36      | .76 <sup>b</sup>    |
|               | Impulsivity                | 8               | 8 - 32      | .58 <sup>a</sup>    |
|               | Fight Flight Freeze System | 10              | 10 - 40     | .70 <sup>b</sup>    |
|               | BIS                        | 23              | 23 - 92     | .91 <sup>d</sup>    |
| RPBS          | Total score                | 26              | 26 - 182    | .91 <sup>d</sup>    |
| STAI          | Trait, no subscales        | 20              | 20 - 80     | .90 <sup>d</sup>    |
| Inhouse       | Affect                     | 7               | 0 - 70      | .88 <sup>c</sup>    |
|               | Motivation                 | 4               | 0 - 40      | .71 <sup>b</sup>    |
| SSS-V         | Total score                | 40              | 0 - 40      | .71 <sup>b</sup>    |
| IPQ           | General Presence           | 1               | (-3) - 3    | -                   |
|               | Spatial Presence           | 5               | (-15) - 15  | .64 <sup>a</sup>    |
|               | Involvement                | 4               | (-12) - 12  | .70 <sup>b</sup>    |
|               | Realness                   | 4               | (-12) - 12  | .68 <sup>a</sup>    |

*Note.* Internal consistency (Cronbach's  $\alpha$ ) was determined for each subscale of the utilized questionnaires (<sup>a</sup> dubious, <sup>b</sup> acceptable, <sup>c</sup> good, <sup>d</sup> excellent). The individual number of items and scale ranges are given as well. FFFS= Fight Flight Freeze System; PA = Positive affect; NA = Negative affect.
